# Supplementary material
Source: PubMed Central journal article supplement (PMC2449356)
Supplement: 0802403105_Supplemental_PDF.pdf [file 0802403105_Supplemental_PDF.pdf]

# Supporting Information

Torkamani *et al.* 10.1073/pnas.0802403105

## Materials and Methods

**Kinase Identifiers.** Kinase protein and DNA reference sequences were obtained from Kinbase. These reference sequences were used as the basis to assign various gene identifiers (including Ensembl gene IDs, HGNC gene symbols, and Entrez gene IDs) to every known human protein kinase. Ultimately, only eukaryotic protein kinases, that is, all human protein kinases except those belonging to the atypical protein kinase family, were considered in this study.

The various gene identifiers were assigned as follows: Ensembl Gene ID's were determined for each protein kinase by BLASTing the reference Kinbase protein sequence against the Ensembl database ([www.ensembl.org/Homo\\_sapiens/blastview](http://www.ensembl.org/Homo_sapiens/blastview)). The Ensembl Gene ID of the top hit was assigned to the protein kinase. The Ensembl Gene ID was then used as a query in Biomart ([www.biomart.org](http://www.biomart.org)) to identify corresponding Entrez Gene ID's and HGNC symbols. To compile a complete set of identifiers, additional gene IDs were assigned by querying the Genecards database ([www.genecards.org](http://www.genecards.org)) and the HUGO Gene Nomenclature Committee database ([www.gene.ucl.ac.uk/nomenclature](http://www.gene.ucl.ac.uk/nomenclature)). The compiled list of identifiers was used as the basis to establish a comprehensive set of disease and common SNPs.

**Compilation and Mapping of All Known Disease and Common SNPs.** Common SNPs are mostly derived from SNPs discovered through resequencing studies, such as the HapMap project, and the Human Genome Project. All known common SNPs were collected as follows: dbSNP was queried through Biomart, using Ensembl Gene IDs, to compile a list of all nonsynonymous SNPs that map to protein kinase gene.

Disease SNPs are mostly derived from directed sequencing of candidate genes known or hypothesized to be involved in inherited diseases. Disease SNPs were collected as follows: Entrez Gene IDs were used to query the OMIM database to compile a list of all known nonsynonymous disease SNPs contained within the database. All disease SNPs contained within KinMutBase (<http://bioinf.uta.fi/KinMutBase>), a database dedicated to collected protein kinase mutations involved in disease, were assigned to kinase genes on the basis of their identifiers and sequence within the KinMutBase database. HGNC Gene Symbols were used to query The Human Gene Mutation Database to collect all known disease SNPs not represented in the previous databases.

At times, the residue number of each SNP derived from the various databases, did not match the residue number of the Kinbase sequence. Therefore, the position of each SNP within the Kinbase sequences was determined, or verified, using flanking sequences from the reference sequence contained within the original SNP database. The identity of the wild type amino acid within the Kinbase database was reconfirmed computationally to ensure accurate mapping of every SNP. In total, 428 disease causing SNPs and 330 common SNPs that mapped to the catalytic core of the protein kinase, were compiled for the analyses.

**Generation of Multiple Pariwise Alignments.** Motif based alignments were generated by implementation of the Gibbs motif sampling method of Neuwald *et al.* (1, 2). Given a set of eukaryotic protein

kinase sequences used to generate conserved motifs, as in Kannan *et al.* (3), the Gibbs motif sampling method identifies characteristic motifs for each individual subdomain of the kinase catalytic core, which are then used to generate high confidence motif-based Markov chain Monte Carlo multiple alignments based upon these motifs (4). These subdomains compromise the core structural components of the protein kinase catalytic core. Intervening regions between these subdomains were not aligned.

**Mapping to Multiple Alignments and Generation of Logo Figures.** A nonredundant set of SNPs was generated to be mapped to the alignment computationally. That is, if multiple disease or common SNPs have been observed at a particular position within a particular protein kinase, it is only considered once in our analysis. The motif based multiple alignments of all eukaryotic protein kinases harboring at least one disease or common SNP were used to generate the logo figures, using WebLogo (5). The number of common SNPs mapping to each position is normalized to account for the larger number of disease SNPs compared with common SNPs observed throughout the catalytic core.

**Simulation Study.** To estimate whether disease SNPs are position-specific or distributed randomly throughout the catalytic domain, in addition to a pairwise correlation, we ran 10,000 Monte Carlo simulations involving random assignment of disease SNPs. That is, the number of mutations per gene was maintained, but the position within the multiple alignment for each SNP was determined randomly. This process was iterated 10,000 times to determine the expected position specific distribution of SNPs if they were distributed throughout the alignment at random.

The SNP distribution resulting from this simulation study compared with the observed distribution was that zero SNPs occurred at an average of  $19.52 \pm 0.03$  positions in the simulation vs. 46 observed positions; one SNP at  $67.58 \pm 0.06$  positions vs. 65 observed positions; 2 SNPs at  $76.95 \pm 0.07$  positions vs. 47 observed positions; three SNPs at  $35.04 \pm 0.04$  positions vs. 18 observed positions, four SNPs at  $7.20 \pm 0.03$  positions vs. 21 observed positions, five SNPs at  $0.69 \pm 0.01$  positions vs. 3 observed positions, six SNPs at  $0.03 \pm 0.002$  positions vs. 3 observed positions, seven SNPs at  $0.0002 \pm 0.0001$  positions vs. 3 observed positions, and eight SNPs at  $0.0 \pm 0.0$  positions vs. 1 observed position. Thus, the observed distribution is enriched for position specific mutations, especially at positions where four or more mutations are observed.

**Structural Analysis.** The DSSP software package (6) was used to calculate solvent accessibilities for twenty structurally characterized human kinases. These structures were also used extensively in all structural analyses. PDB entries: 1A9U (p38a), 1AQ1 (CDK2), 1B6C (TGFbR1), 1B17 (CDK6), 1CM8 (p38g), 1QPJ (LCK), 1FGK (FGFR1), 1FVR (TIE2), 1GAG (INSR), 1GJO (FGFR2), 1GZN (AKT2), 1IA8 (CHK1), 1K2P (BTK), 1M14 (EGFR), 1MQB (EphA2), 1MUO (AurA), 1QCF (HCK), 1R1W (MET), 1RJB (FLT3), and 1U59 (ZAP70).

1. Lawrence CE, *et al.* (1993) Detecting subtle sequence signals: A Gibbs sampling strategy for multiple alignment. *Science* 262(5131):208–14.
2. Neuwald AF, Liu JS, Lawrence CE (1995) Gibbs motif sampling: Detection of bacterial outer membrane protein repeats. *Protein Sci* 4:1618–32.
3. Kannan N, Taylor SS, Zhai Y, Venter JC, Manning G (2007) Structural and functional diversity of the microbial kinome. *PLoS Biol* 5(3):e17.

4. Neuwald AF, Liu JS (2004) Gapped alignment of protein sequence motifs through Monte Carlo optimization of a hidden Markov model. *BMC Bioinformatics* 5:157.
5. Crooks GE, Hon G, Chandonia JM, Brenner SE (2004) WebLogo: A sequence logo generator. *Genome Res* 14:1188–1190.
6. Kabsch W, Sander C (1983) Dictionary of protein secondary structure: Pattern recognition of hydrogen-bonded and geometrical features. *Biopolymers* 22:2577–2637.

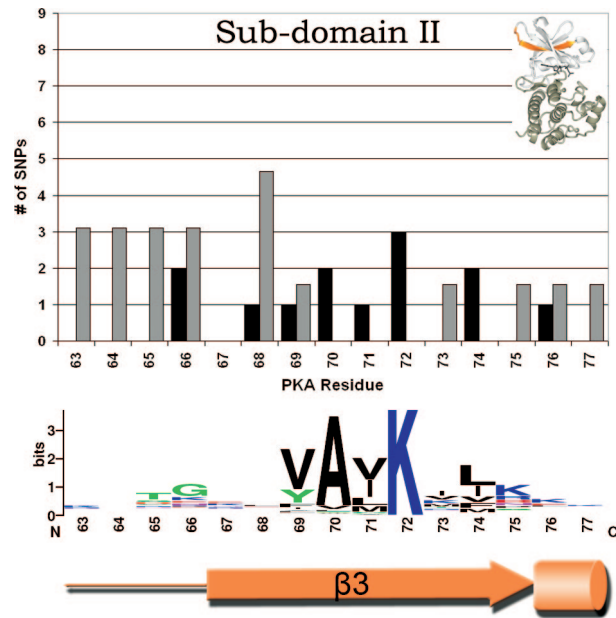

Fig. 51. Subdomain II.

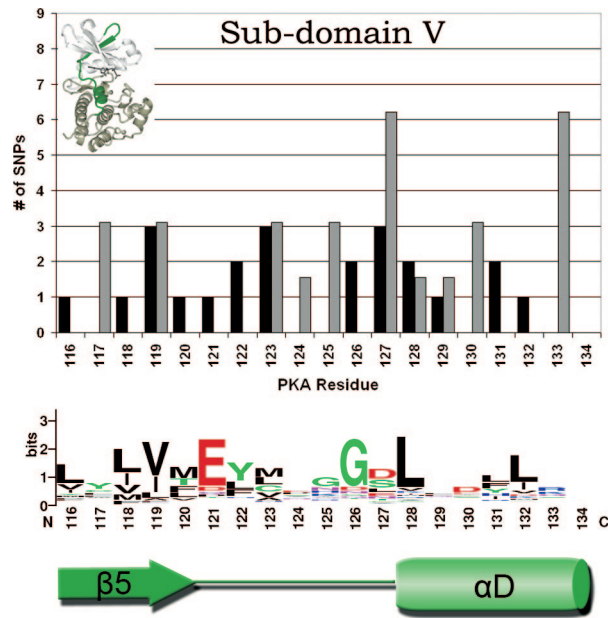

Fig. S2. Subdomain V.

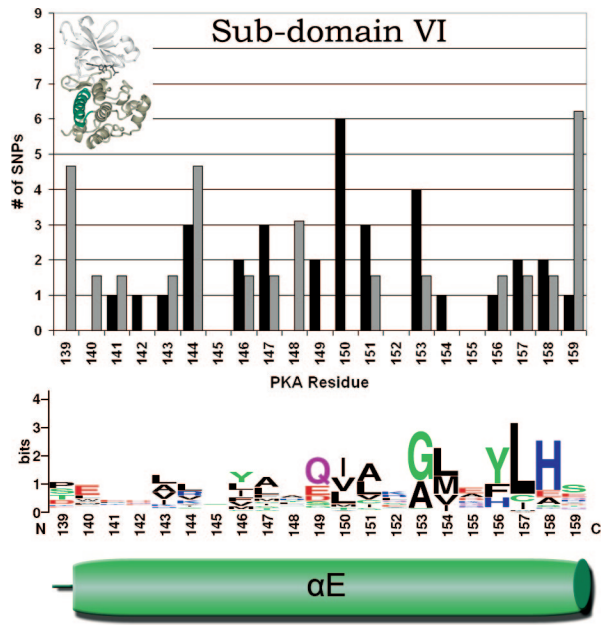

Fig. S3. Subdomain VI.

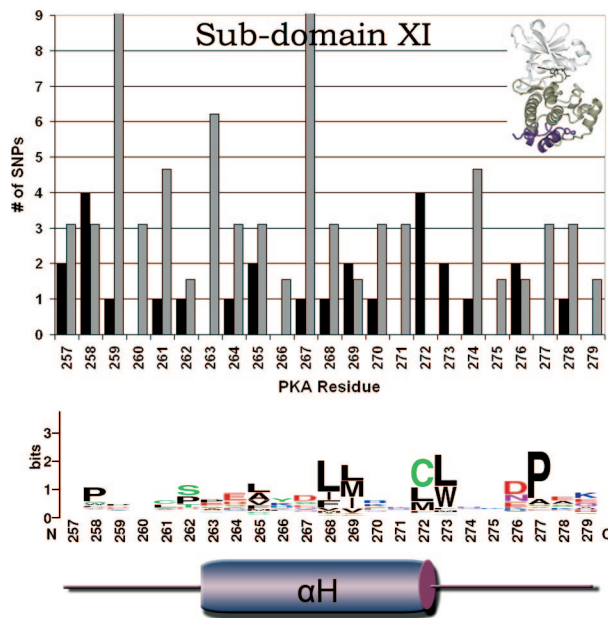

Fig. S4. Subdomain XI.

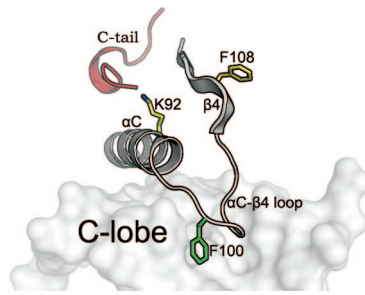

Fig. S5. The  $\alpha$ C- $\beta$ 4 region.



**Table S1. Subdomain definitions**

| Subdomain | PKA Residues |
|-----------|--------------|
| I         | 43–60        |
| Ia        | 61–62        |
| II        | 63–77        |
| IIa       | 78–84        |
| III–IV    | 85–114       |
| IVa       | 115          |
| V         | 116–134      |
| Va        | 135–138      |
| VI        | 139–159      |
| VIa       | —            |
| VII       | 160–175      |
| VIIa      | 176          |
| VIII      | 177–191      |
| VIIIa     | 192–198      |
| IX        | 199–212      |
| IXa       | 213–214      |
| X(i)      | 215–225      |
| X(i)a     | —            |
| X(ii)     | 226–240      |
| X(ii)a    | 241–256      |
| XI        | 257–279      |
| XII       | 280–294      |
| XIIa      | —            |

Residue Positions Correspond to PKA Residues. Note that regions V(i)a and X(i)a are present in other kinases but not PKA.



**Table S2. Disease-associated residues**

| Disease SNPs, no. | PKA position | Subdomain | Proposed function                                                                                                                                                       |
|-------------------|--------------|-----------|-------------------------------------------------------------------------------------------------------------------------------------------------------------------------|
| 8                 | E208         | IX        | Located in the APE motif and forms a salt bridge with R280 (see text)                                                                                                   |
| 7                 | R165         | VII       | Coordinates with activation loop phosphate                                                                                                                              |
|                   | E170         | VII       | Hydrogen bonds to the P-2 arginine in the inhibitory peptide in PKA                                                                                                     |
| 6                 | R280         | XII       | Forms a salt bridge with E208 (see text)                                                                                                                                |
|                   | G55          | I         | The C-terminal glycine in the GXGXXG motif. Contributes to the conformation flexibility of the P-loop [16,17]                                                           |
|                   | I150         | VI        | Located in the middle of the E-helix and is part of the hydrophobic core                                                                                                |
| 5                 | W222         | X(i)      | This tryptophan forms a CH-pi interaction with the proline of the APE motif and also hydrogen bonds to a conserved water molecule (see text).                           |
|                   | <i>F108</i>  | III-IV    | Located in the $\beta 4$ strand, which is located right above the $\alpha C$ -helix and forms a docking site for the regulatory C-tail in AGC kinases [21].             |
|                   | D166         | VII       | Catalytic residue that coordinates with the hydroxyl group of the substrate                                                                                             |
| 4                 | F238         | X(ii)     | Conserved in ePKs and is part of hydrophobic core in the C-lobe [26]                                                                                                    |
|                   | K92          | III-IV    | Located in the C-helix. The equivalent residue in Cdk2 interacts with cyclin, which is a regulator of Cdk2 [20]                                                         |
|                   | <i>F100</i>  | III-IV    | A conserved residues in AGC kinases, which interacts with the C-terminal tail [21]                                                                                      |
|                   | T153         | VI        | Located in the E-helix                                                                                                                                                  |
|                   | N171         | VII       | Catalytic residue                                                                                                                                                       |
|                   | I180         | VIII      | Located in the $\beta 8$ strand and packs up against I150 in the E-helix                                                                                                |
|                   | T183         | VIII      | Located right before the catalytic aspartate in the DFG motif and undergoes a backbone torsion angle change when the DFG-Phe protrudes into the ATP binding pocket [26] |
|                   | G186         | VIII      | Located within the DFG motif and contributes to the conformational flexibility of the activation loop                                                                   |
|                   | K189         | VIII      | Coordinates with the phosphate of the residue that gets phosphorylated in the Activation Loop [41]                                                                      |
|                   | R190         | VIII      | Solvent exposed and interacts with a Tryptophan (W30) in the N-terminal helix of PKA                                                                                    |
|                   | E203         | IX        | Hydrogen bonds to the peptide substrate in PKA                                                                                                                          |
|                   | Y204         | IX        | Interacts with substrate and is part of an essential hydrophobic core in the C-lobe. Hydrogen bonds to the Catalytic Loop.                                              |
|                   | L205         | IX        | Part of the substrate binding ( $P + 1$ ) pocket                                                                                                                        |
|                   | A206         |           | Located in the APE motif                                                                                                                                                |
|                   | P207         | IX        | Located in the APE motif                                                                                                                                                |
|                   | V226         | X(ii)     | Located in the F-helix and part of the C-lobe hydrophobic core. Anchors the Catalytic Loop.                                                                             |
|                   | Y229         | X(ii)     | Located at the C-terminus of the F-helix. Anchors the F-helix to the G-helix through a hydrogen bond to the F-H loop.                                                   |
|                   | E230         | X(ii)     | Located in the F-helix and hydrogen bonds to Y204 in the $P + 1$ pocket. Recognition of the P-2 residue in the substrate.                                               |
|                   | G234         | X(ii)     | Located in the loop connecting F and G-helix and likely contributes to the conformational flexibility of this loop                                                      |
|                   | P258         | XI        | Located in the loop connecting G-helix and H-helix and packs up against Y229 in the F-helix (see above)                                                                 |
|                   | L272         | XI        | Located in the H-helix and anchors the I-helix, which defines the end of the catalytic core.                                                                            |
|                   | H294         | XII       | H294 located in the I-helix. Recognition of the P-2 residue in the substrate.                                                                                           |

Shown are significantly disease-associated residues. C-lobe residues are bolded, N-lobe residues are in italics. All positions containing five or more disease-causing mutations exceed the expectation by random chance. Approximately 65% of positions containing four mutations are in excess of the expectation by random chance.

**Table S3. Disease hotspots**

| Mutation                  | Kinase                                                                                                                | Disease                                                                                                                                                                                                                                                        |
|---------------------------|-----------------------------------------------------------------------------------------------------------------------|----------------------------------------------------------------------------------------------------------------------------------------------------------------------------------------------------------------------------------------------------------------|
| Third Glycine of GxGxxG   | BTK (G-R)<br>INSR (G-V)<br>KIT (G-R)<br>RSK2 (G-R)<br>TRKA (G-R)<br>FLT4 (G-R)                                        | Agammaglobulinaemia<br>Diabetes, non-insulin dependent<br>Piebaldism<br>Coffin-Lowry syndrome<br>Pain insensitivity<br>Lymphoedema                                                                                                                             |
| Arginine of HRD (R165)    | AKT2 (R-H)<br>ALK1(R-H)<br>BTK (R-Q,G)<br>INSR (R-W,Q)<br>KIT (R-G)<br>RET (R-Q)<br>TRKA (R-W)                        | Severe insulin resistance and diabetes mellitus<br>Haemorrhagic telangiectasia 2<br>Agammaglobulinaemia<br>Rabson-Mendenhall (W), Insulin resistance (Q)<br>Piebaldism<br>Hirschsprung disease<br>Pain insensitivity, congenital                               |
| Arginine of VII (E170)    | BTK (R-Q,P,G)<br>FLT4 (R-P,Q,W)<br>JAK3 (R-W)<br>KIT (R-G)<br>PHKg2 (E-K)<br>TRKA (R-C)<br>ZAP70 (R-H)<br>ZAP70 (R-C) | Agammaglobulinaemia<br>Lymphoedema, primary<br>Immunodeficiency, severe combined<br>Piebaldism<br>Phosphorylase kinase deficiency and cirrhosis<br>Pain insensitivity, congenital<br>Selective T-cell defect (H),<br>T-B- severe combined immunodeficiency (C) |
| Glutamate of APE (E208)   | ALK1 (E-K)<br>BMP2 (E-G)<br>BTK (E-D,K)<br>INSR (E-K,D)<br>JAK3 (E-K)<br>KIT (E-K)<br>PINK1 (E-G)<br>RET (E-K)        | Haemorrhagic telangiectasia 2<br>Pulmonary hypertension, primary<br>Agammaglobulinaemia<br>Leprechaunism<br>Immunodeficiency, severe combined<br>Childhood-onset sporadic mastocytosis<br>Parkinson disease, early-onset<br>Hirschsprung disease               |
| Tryptophan of X(i) (W222) | ALK1 (W-S)<br>ANPb (Y-C)<br>BTK (W-R)<br>INSR (W-L)<br>LKB1 (W-C)<br>TGFbR2 (Y-C)                                     | Haemorrhagic telangiectasia 2<br>Acromesomelic dysplasia, Maroteaux type<br>Agammaglobulinaemia<br>Insulin resistance, type A<br>Peutz-Jeghers syndrome<br>Head and neck squamous carcinoma                                                                    |
| Arginine of XII (R280)    | ALK1 (R-L)<br>ANPb (R-W)<br>BMP2 (R-W,Q)<br>BTK (R-C)<br>LKB1 (R-K,S)<br>RHOK (R-H)<br>TGFbR2 (R-H,C)                 | Haemorrhagic telangiectasia 2<br>Acromesomelic dysplasia, Maroteaux type<br>Pulmonary hypertension, primary<br><br>Agammaglobulinaemia<br>Peutz-Jeghers syndrome<br>Retinitis pigmentosa<br>Loeys-dietz syndrome                                               |

**Table S4. Diseases associated with kinase mutations**

| Name   | Disease                                                                                         |
|--------|-------------------------------------------------------------------------------------------------|
| AKT2   | Diabetes Mellitus, Type II                                                                      |
| ALK1   | Coffin-Lowry syndrome                                                                           |
| ALK1   | Hereditary hemorrhagic telangiectasia                                                           |
| ALK1   | Pulmonary arterial hypertension, hereditary hemorrhagic telangiectasia-related                  |
| ANPb   | Acromesomelic Dysplasia                                                                         |
| BMPR1A | Cowden-like syndrome                                                                            |
| BMPR1A | Juvenile polyposis syndrome                                                                     |
| BMPR1B | Brachydactyly, Type A2                                                                          |
| BMPR2  | Juvenile polyposis syndrome                                                                     |
| BMPR2  | Primary pulmonary hypertension                                                                  |
| BTK    | Agammaglobulinemia, X-linked                                                                    |
| BTK    | Retinitis pigmentosa                                                                            |
| CDK4   | Melanoma                                                                                        |
| CDKL5  | Rett Syndrome                                                                                   |
| CHK2   | Prostate cancer                                                                                 |
| CK1d   | Advanced Sleep Phase Syndrome                                                                   |
| CYGD   | Leber congenital amaurosis                                                                      |
| EphB2  | Prostate cancer                                                                                 |
| ErbB2  | Gastric Cancer                                                                                  |
| ErbB2  | Glioblastoma                                                                                    |
| ErbB2  | Ovarian Carcinoma                                                                               |
| FGFR1  | Kallman Syndrome                                                                                |
| FGFR2  | Craniosynostosis                                                                                |
| FGFR2  | Crouzan Syndrome                                                                                |
| FGFR2  | Pfeiffer syndrome                                                                               |
| FGFR3  | Hypochondroplasia                                                                               |
| FLT3   | Acute myeloid leukemia                                                                          |
| FLT4   | Lymphoedema                                                                                     |
| INSR   | Insulin resistance                                                                              |
| INSR   | Insulin-resistant diabetes mellitus with acanthosis nigricans and the polycystic ovary syndrome |
| INSR   | Leprechaunism                                                                                   |
| INSR   | Noninsulin-dependent diabetes mellitus (NIDDM)                                                  |
| JAK3   | T-B + severe combined immunodeficiency                                                          |
| KIT    | Childhood-onset sporadic mastocytosis                                                           |
| KIT    | Gastrointestinal Stromal Tumor                                                                  |
| KIT    | Germ cell tumor                                                                                 |
| KIT    | Piebaldism                                                                                      |
| LKB1   | Colon cancer                                                                                    |
| LKB1   | Melanoma                                                                                        |
| LKB1   | Minimal deviation adenocarcinoma (MDA)                                                          |
| LKB1   | Peutz-Jeghers syndrome                                                                          |
| LKB1   | Sporadic malignant melanoma                                                                     |
| LTK    | Systemic lupus erythematosus                                                                    |
| MASTL  | Thrombocytopenia                                                                                |
| MET    | Hepatocellular carcinoma                                                                        |
| MET    | Hereditary papillary renal carcinoma                                                            |
| MISR2  | Persistent Mullerian duct syndrome, Type II                                                     |
| MISR2  | Primary pulmonary hypertension                                                                  |
| MUSK   | Myasthenic Syndrome                                                                             |
| PAK3   | Mental Retardation, X-linked                                                                    |
| PDGFRa | Gastrointestinal Stromal Tumor                                                                  |
| PEK    | Wolcott-Rallison syndrome                                                                       |
| PHKg2  | Deficiency of liver phosphorylase kinase and cirrhosis                                          |
| PHKg2  | T-B + severe combined immunodeficiency                                                          |
| PINK1  | Parkinsons                                                                                      |
| RET    | Familial medullary thyroid carcinoma                                                            |
| RET    | Hirschsprung Disease                                                                            |
| RET    | Multiple Endocrine Neoplasia                                                                    |
| RET    | Multiple endocrine neoplasia type II                                                            |
| RET    | Pancreatic cancer                                                                               |
| RET    | Peutz-Jeghers syndrome                                                                          |
| RET    | Sporadic medullary thyroid carcinoma                                                            |
| RHOK   | Persistent Mullerian duct syndrome, Type II                                                     |
| RHOK   | Prostate cancer                                                                                 |

| Name   | Disease                                              |
|--------|------------------------------------------------------|
| RHOK   | Retinitis pigmentosa                                 |
| RNAseL | Prostate cancer                                      |
| ROR2   | Li-Fraumeni syndrome                                 |
| RSK2   | Coffin-Lowry syndrome                                |
| TGFbR1 | Various Cancers                                      |
| TGFbR2 | Aortic Aneurysm                                      |
| TGFbR2 | Cutaneous T-cell lymphoma                            |
| TGFbR2 | Head and neck squamous carcinoma                     |
| TGFbR2 | Hereditary nonpolyposis colorectal cancer            |
| TGFbR2 | Loeys-dietz syndrome                                 |
| TGFbR2 | Marfan Syndrome                                      |
| TIE2   | Venous malformations, multiple cutaneous and mucosal |
| TRKA   | Congenital insensitivity to pain and anhidrosis      |
| TRKA   | IRAK4 deficiency                                     |
| ZAP70  | Selective T-cell defect                              |
| ZAP70  | T-B- severe combined immunodeficiency                |
